# Supplementary material
Source: ML conference proceedings conference paper supplement (https://openaccess.thecvf.com/content/CVPR2024/html/Ding_Clustering_Propagation_for_CVPR_2024_paper.html)
Supplement: Supplementary file 1 [file Ding_Clustering_Propagation_for_CVPR_2024_supplemental.pdf]

# Clustering Propagation for Universal Medical Image Segmentation

## Supplemental Material

Yuhang Ding<sup>1</sup>, Liulei Li<sup>1</sup>, Wenguan Wang<sup>2</sup>, Yi Yang<sup>2</sup>

<sup>1</sup> ReLER, AAIL, University of Technology Sydney <sup>2</sup> ReLER, CCAI, Zhejiang University

<https://github.com/dyh127/S2VNet>

This document provides additional qualitative results and discussions of S2VNet, which are organized as follows:

- Additional Details (§A)
- Discussion (§B)

### A. Additional Details

**Image Preprocessing** Following nnUnet[1], we firstly clip intensity of CT images into a range of -175 to 250. For MRI images, the clipping is performed using the 0.5 and 99.5 percentiles of the intensity values within each image. Then, we rescale images into the range of 0 to 255.

**Qualitative Results** We provide additional visual comparison results on three datasets, including WORD[5] test in Fig. S1, BTCV[3] in Fig. S2, and AMOS[2] val in Fig. S3.

**Failure Cases** We provide failure cases in Fig. S4. As seen, our method faces challenges in segmenting small objects or targets with indistinct boundaries, which is commonly observed in previous method[6].

### B. Discussion

**Limitation** In comparison to state-of-the-art methods, S2VNet stands out by seamlessly integrating both automatic and interactive medical segmentation, showing notable computational efficiency, and achieving better accuracy in multi-class segmentation. However, S2VNet only addresses predefined classes during automatic segmentation, remaining unable to handle undefined classes. We will explore this direction to improve S2VNet in the future work.

**Broader Impact** This paper introduces S2VNet, a method with potential applications in various medical contexts, such as the early detection of diseases and the development of personalized treatment plans. Furthermore, the speed and user-friendly nature of S2VNet can not only alleviate the workload of experts but also seek to mitigate the increasing burden faced by the healthcare system as a whole.

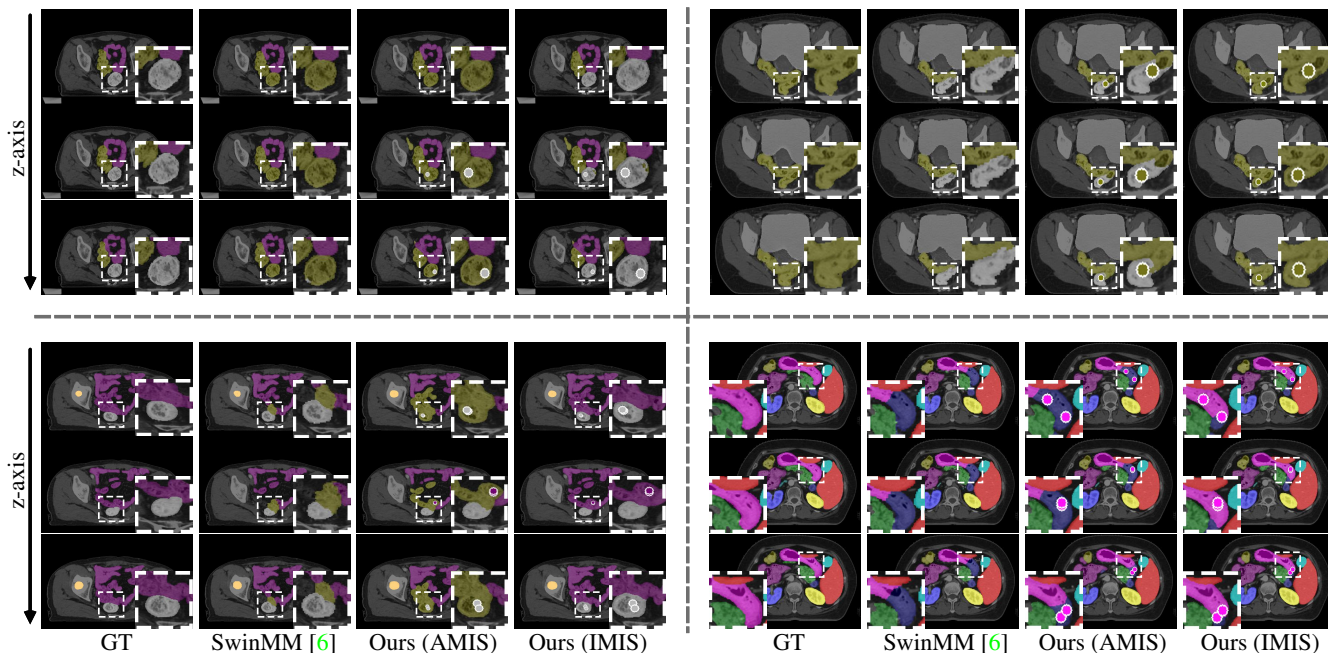

Figure S1. Visual comparison results on WORD[5] test.

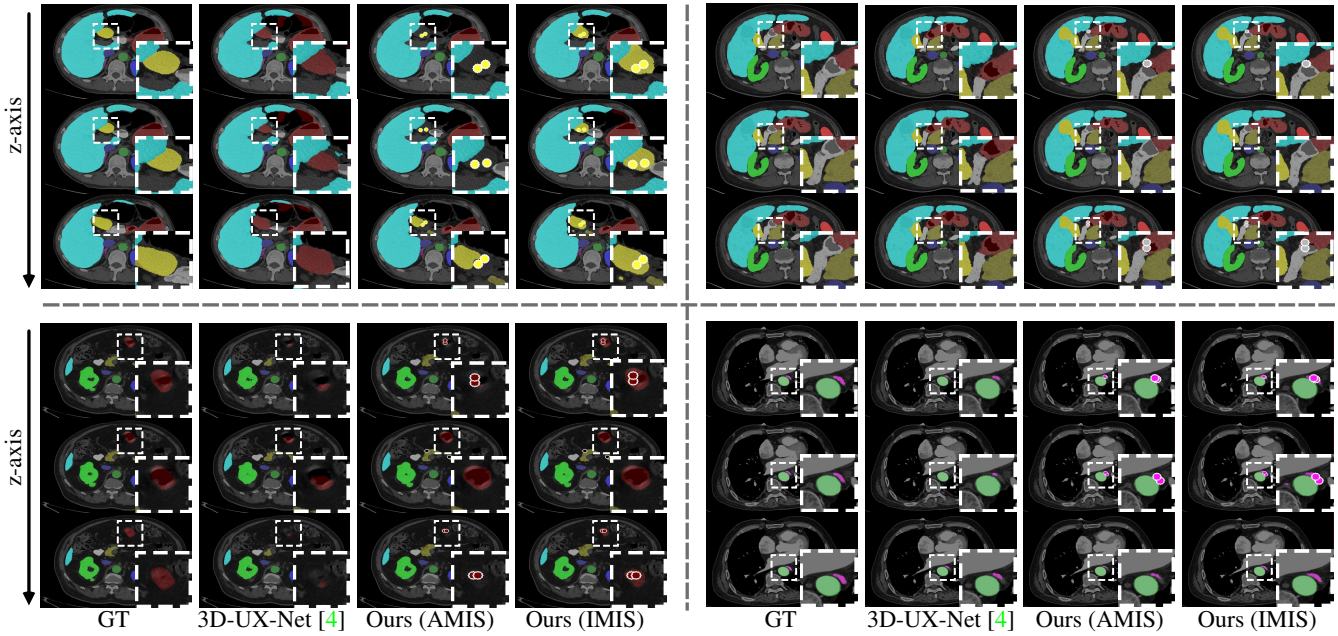

Figure S2. Visual comparison results on BTCV[3].

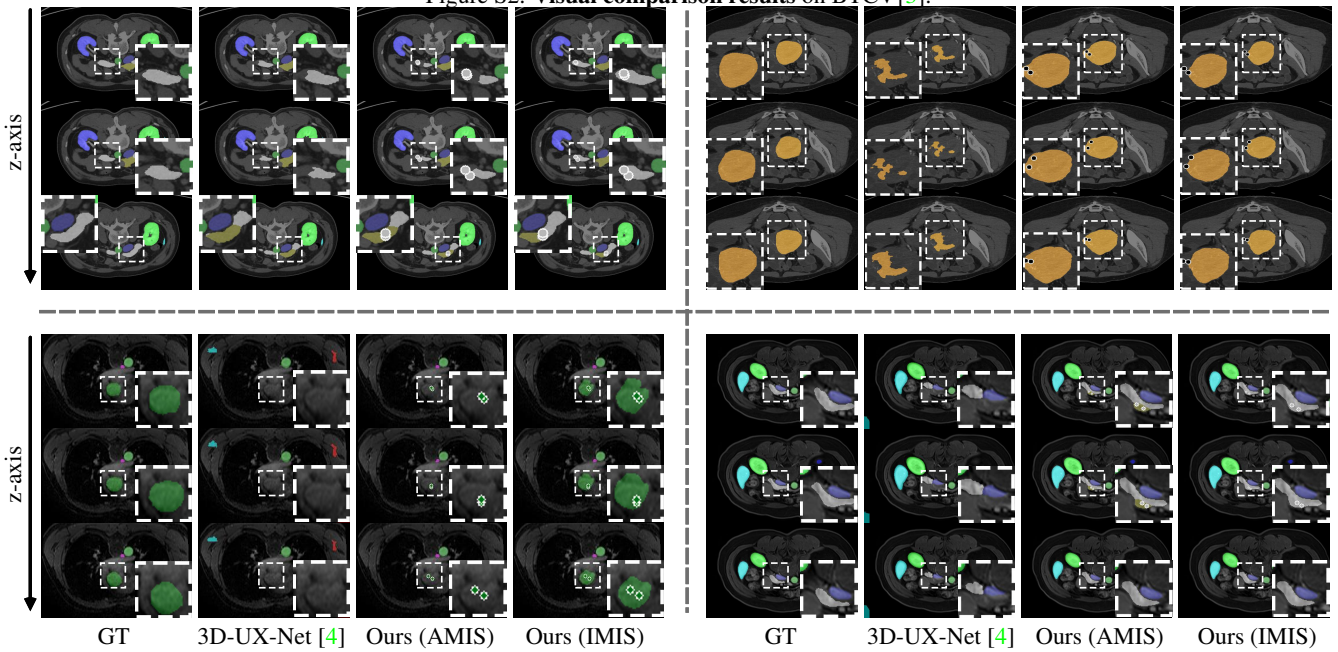

Figure S3. Visual comparison results on AMOS[2] val. Top: AMOS CT samples. Bottom: AMOS MR samples.

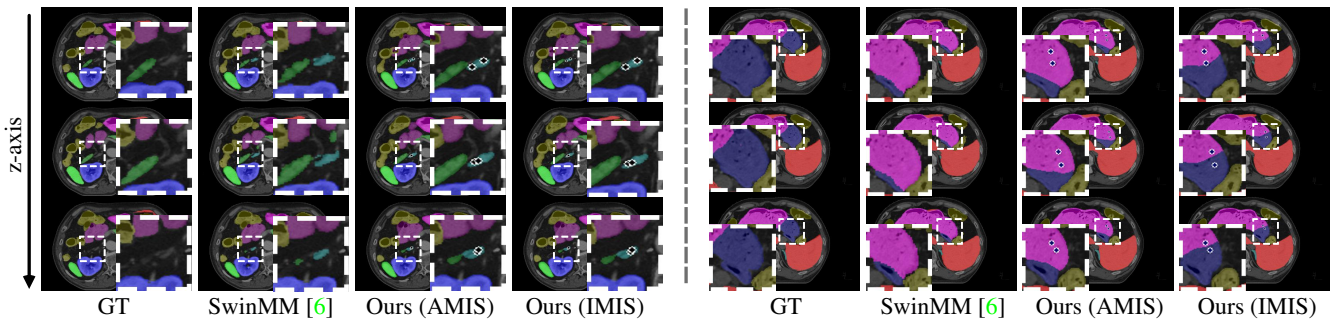

Figure S4. Failure cases on WORD[5] test.

## References

- [1] Fabian Isensee, Paul F Jaeger, Simon AA Kohl, Jens Petersen, and Klaus H Maier-Hein. nnu-net: a self-configuring method for deep learning-based biomedical image segmentation. *Nature methods*, 18(2):203–211, 2021. [1](#)
- [2] Yuanfeng Ji, Haotian Bai, Chongjian Ge, Jie Yang, Ye Zhu, Ruimao Zhang, Zhen Li, Lingyan Zhannng, Wanling Ma, Xiang Wan, et al. Amos: A large-scale abdominal multi-organ benchmark for versatile medical image segmentation. In *NeurIPS*, 2022. [1](#), [2](#)
- [3] Bennett Landman, Zhoubing Xu, J Igelsias, Martin Styner, T Langerak, and Arno Klein. Miccai multi-atlas labeling beyond the cranial vault—workshop and challenge. In *MICCAI Multi-Atlas Labeling Beyond Cranial Vault—Workshop Challenge*, 2015. [1](#), [2](#)
- [4] Ho Hin Lee, Shunxing Bao, Yuankai Huo, and Bennett A Landman. 3d ux-net: A large kernel volumetric convnet modernizing hierarchical transformer for medical image segmentation. In *ICLR*, 2023. [2](#)
- [5] Xiangde Luo, Wenjun Liao, Jianghong Xiao, Jieneng Chen, Tao Song, Xiaofan Zhang, Kang Li, Dimitris N Metaxas, Guotai Wang, and Shaoting Zhang. Word: A large scale dataset, benchmark and clinical applicable study for abdominal organ segmentation from ct image. *Medical Image Analysis*, 82:102642, 2022. [1](#), [2](#)
- [6] Yiqing Wang, Zihan Li, Jieru Mei, Zihao Wei, Li Liu, Chen Wang, Shengtian Sang, Alan L Yuille, Cihang Xie, and Yuyin Zhou. Swinmm: masked multi-view with swin transformers for 3d medical image segmentation. In *MICCAI*, 2023. [1](#), [2](#)
